# Supplementary material for: Transcriptomic Profiling and Physiological Analysis of Haloxylon ammodendron in Response to Osmotic Stress
Source: PubMed Central journal article supplement (PMC5796034; doi:10.3390/ijms19010084), 2017-12-29
Supplement: ijms-19-00084-s001.pdf [file ijms-19-00084-s001.pdf]

# Supplementary Materials: Transcriptomic profiling and physiological analysis of *Haloxylon ammodendron* in response to osmotic stress

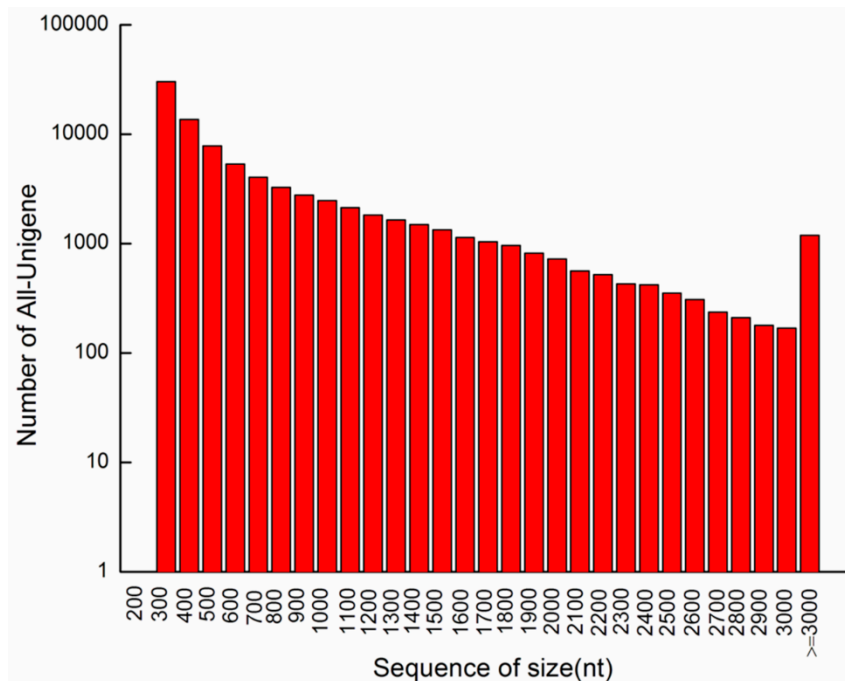

Figure S1. Length distribution of assembled Unigenes.

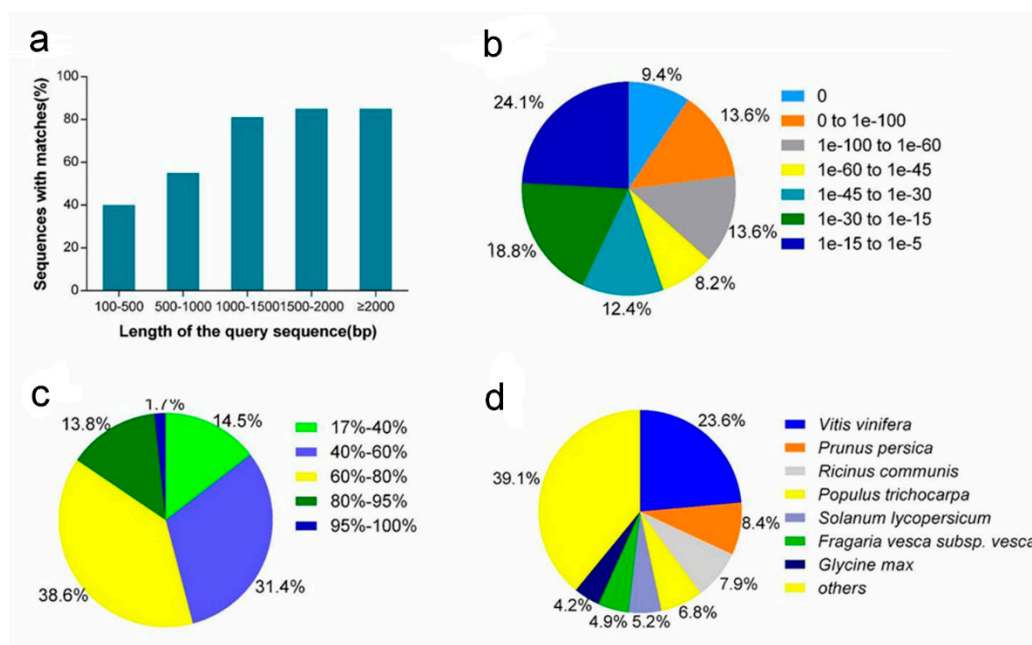

Figure S2. Characteristics of homology search of query sequences aligned by BLASTx to the nr database. (a) Effect of query length on the BLAST matches. (b) E-value distribution of unigenes BLASTx hits in the nr database with an E-value threshold of 1.0E-5. (c) Species distribution of the top BLAST hits for each sequence with a cut-off E-value of 1.0E-5. (d) Similarity distribution of the top BLAST hits for each sequence with a cut-off E-value of 1.0E-5.

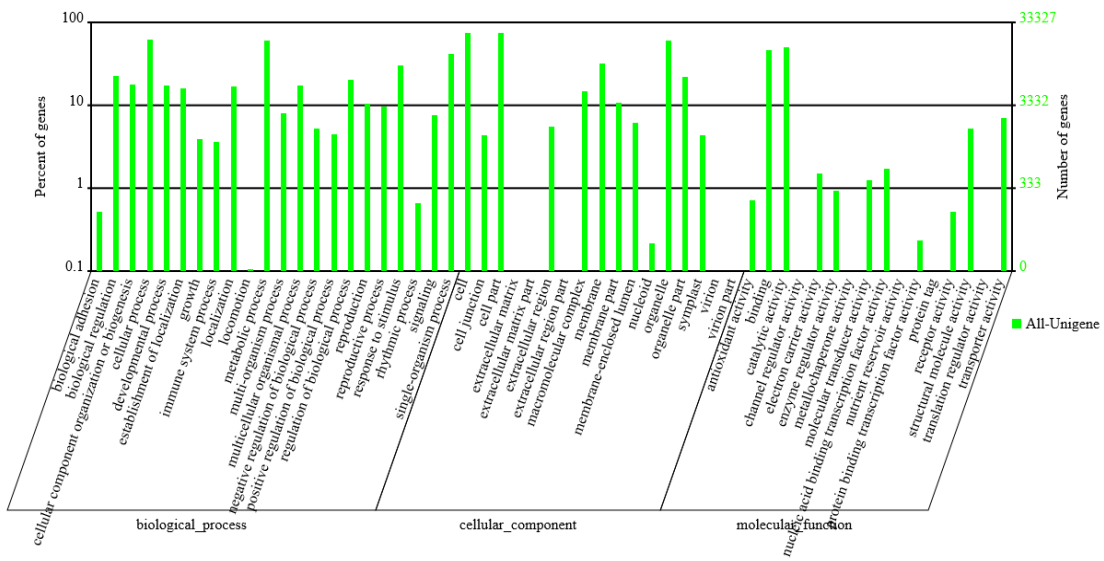

**Figure S3.** Functional classifications of GO terms of all assembled unigenes. The results are summarized in three main categories: biological process, cellular component, and molecular function. The right y-axis indicates the number of genes in a category. The left y-axis indicates percentage of a specific category of genes.

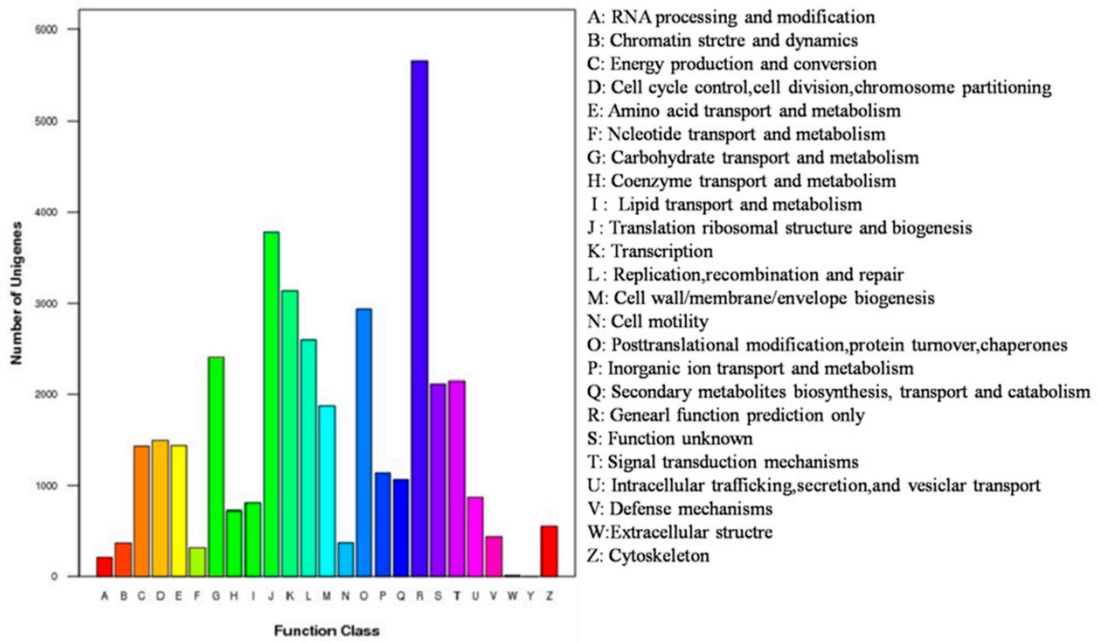

**Figure S4.** Distribution of unigenes in the transcriptome with COG functional classification. 19,196 sequences have a COG classification among 25 categories.

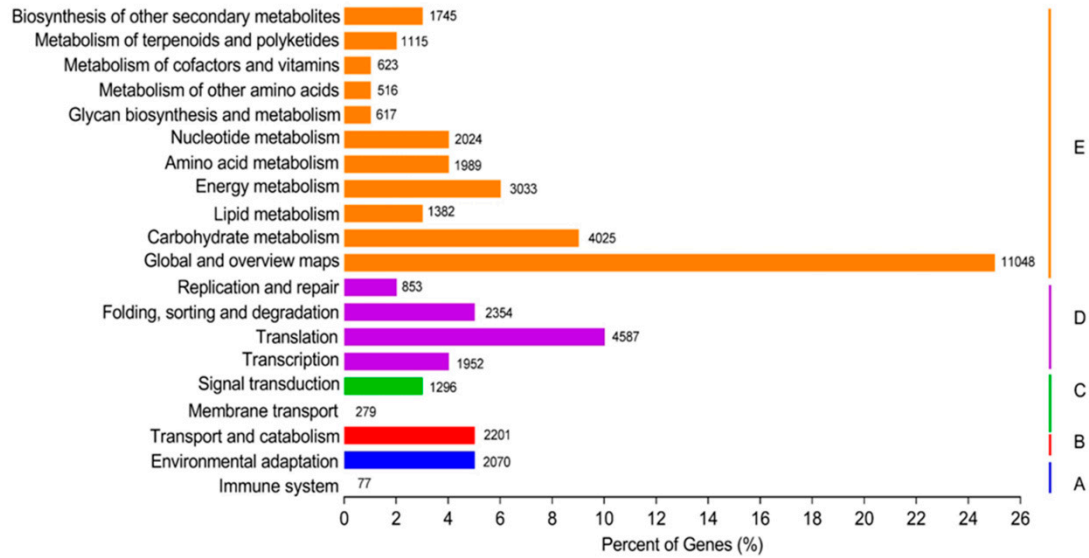

**Figure S5.** Number of all-unigenes in each clade of the KEGG pathway maps. The all-unigenes were classified into 20 clades under five major categories. In each category, the clades are listed according to their abundancies of all-unigenes.

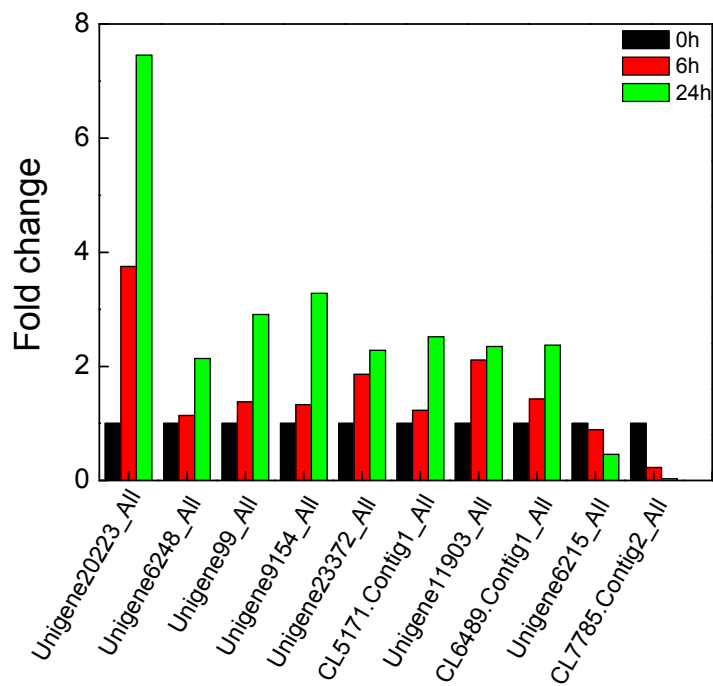

**Figure S6.** The fold changes of relative gene expression levels by Quantitative RT-PCR analysis for ten randomly selected DEGs.

Table S1 Output of statistics of sequence analysis

| Samples | Total raw reads | Total clean reads | Total clean nucleotides(nt) | Q20 percentage | N percentage | GC percentage |
|---------|-----------------|-------------------|-----------------------------|----------------|--------------|---------------|
| Shoots  | 76,087,174      | 69,414,094        | 6,247,268,460               | 98.04%         | 0.00%        | 43.50%        |
| Roots   | 75,376,466      | 69,232,936        | 6,230,964,240               | 97.90%         | 0.00%        | 43.95%        |

Table S2 BLAST analysis of the non-redundant unigenes against public databases

| Database    | Nr     | Nt     | Swiss-prot | KEGG   | COG    | GO     | All    |
|-------------|--------|--------|------------|--------|--------|--------|--------|
| Hit numbers | 47,522 | 32,356 | 31,797     | 28,794 | 19,196 | 33,327 | 50,452 |
| %           | 54.55  | 37.14  | 36.50      | 33.05  | 22.04  | 38.26  | 57.92  |

Table S3 Statistics of DGE sequencing of shoots and leaves of *H. ammodendron* on under drought stress

| Summary                 | S-0                   | S-6                   | S-24                  | R-0                   | R-6                   | R-24                  |
|-------------------------|-----------------------|-----------------------|-----------------------|-----------------------|-----------------------|-----------------------|
| Raw Tags                | 11,780,059            | 11,733,897            | 12,256,083            | 11,771,062            | 12,106,534            | 12,490,186            |
| Distinct Tags           | 1,181,245             | 1,230,050             | 1,481,336             | 1,490,453             | 1,566,343             | 1,782,339             |
| Clean Tags              | 11,120,936            | 11,073,647            | 11,476,269            | 10,908,694            | 11,240,442            | 11,520,622            |
| Distinct Clean Tags     | 528,477               | 575,636               | 706,493               | 633,042               | 705,321               | 817,454               |
| Map to Gene Tags        | 8,445,700<br>(75.94%) | 8,093,382<br>(73.09%) | 7,773,532<br>(67.74%) | 7,561,770<br>(69.32%) | 7,307,256<br>(65.01%) | 6,961,351<br>(60.43%) |
| Unique Map to Gene Tags | 7,095,240<br>(63.80%) | 6,779,012<br>(61.22%) | 6,506,445<br>(56.69%) | 6,399,320<br>(58.66%) | 6,114,393<br>(54.40%) | 5,755,489<br>(49.96%) |

Table S4 The continuously up-regulated or down-regulated unigenes related to transporters in shoots and roots in *H. ammodendron* under sorbitol treatment

| Gene ID            | Log2 ratio |        | Functional annotation                    |
|--------------------|------------|--------|------------------------------------------|
|                    | 6h/0h      | 24h/0h |                                          |
| Shoots             |            |        |                                          |
| Unigene99_All      | 0.59       | 1.30   | AKT1-like                                |
| Unigene19843_All   | 0.59       | 1.90   | Mkt1p                                    |
| CL4885.Contig2_All | 0.26       | 1.05   | CNGC-17-like                             |
| Unigene6248_All    | 0.34       | 1.36   | ER-type calcium ATPase                   |
| Unigene2055_All    | -1.03      | -1.00  | calcium antiporter 1                     |
| Unigene20156_All   | -0.55      | -1.22  | vacuolar H <sup>+</sup> -pyrophosphatase |
| Roots              |            |        |                                          |
| Unigene23862_All   | -1.04      | -3.92  | vacuolar iron transporter                |
| Unigene11712_All   | -2.48      | -3.13  | nitrate transporter 1.1                  |
| Unigene12228_All   | -0.35      | -1.82  | cation/H <sup>+</sup> antiporter 20-like |

Table S5 The continuously up-regulated or down-regulated unigenes related to signal transduction in shoots and roots in *H. ammodendron* under sorbitol treatment

| Gene ID            | Log2 ratio |        | Functional annotation |
|--------------------|------------|--------|-----------------------|
|                    | 6h/0h      | 24h/0h |                       |
| Shoots             |            |        |                       |
| Unigene11736_All   | 3.91       | 5.36   | WRKY6                 |
| Unigene13756_All   | 0.75       | 1.99   | WRKY1                 |
| CL1607.Contig1_All | 1.66       | 2.60   | WRKY1                 |
| Unigene25241_All   | 1.33       | 2.00   | WRKY                  |

|                     |      |      |                                                                  |
|---------------------|------|------|------------------------------------------------------------------|
| Unigene1029_All     | 1.49 | 1.67 | Myb14                                                            |
| Unigene23372_All    | 0.14 | 1.40 | MYB39-like                                                       |
| Unigene2036_All     | 1.97 | 3.10 | erf8                                                             |
| Unigene21677_All    | 1.22 | 3.65 | NAC                                                              |
| CL5088.Contig3_All  | 1.35 | 3.52 | AP2                                                              |
| CL5171.Contig1_All  | 0.68 | 2.35 | GRAS                                                             |
| Unigene3111_All     | 0.41 | 2.88 | AP2/ERF                                                          |
| Unigene11527_All    | 0.52 | 2.17 | AP2/ERF                                                          |
| Unigene10170_All    | 0.37 | 1.80 | ERF11                                                            |
| Unigene12334_All    | 0.73 | 1.39 | HSF24-like                                                       |
| Unigene16628_All    | 1.20 | 2.55 | ERF9-like                                                        |
| Unigene4961_All     | 2.12 | 2.27 | Homeobox leucine zipper protein                                  |
| Unigene3770_All     | 0.93 | 1.62 | CCCH-type zinc finger protein                                    |
| Unigene26900_All    | 2.11 | 2.69 | ZAT10-like                                                       |
| CL6105.Contig2_All  | 1.87 | 2.95 | Calmodulin-binding protein                                       |
| Unigene917_All      | 0.37 | 1.81 | Putative calcium-binding protein                                 |
| CL7251.Contig1_All  | 0.13 | 1.74 | Calcium-binding protein CML42                                    |
| Unigene868_All      | 2.47 | 4.26 | MAPKK-2                                                          |
| CL3509.Contig2_All  | 0.10 | 2.09 | MAPKK-2                                                          |
| CL7538.Contig3_All  | 1.11 | 2.75 | CDPK2                                                            |
| CL7538.Contig2_All  | 1.38 | 3.39 | CDPK2                                                            |
| CL809.Contig3_All   | 1.31 | 1.61 | CDPK10                                                           |
| Unigene8948_All     | 1.11 | 1.84 | AMPK                                                             |
| Unigene978_All      | 0.30 | 1.36 | Receptor protein kinase-like protein                             |
| CL1255.Contig5_All  | 1.36 | 2.07 | Receptor-like protein kinase                                     |
| CL2696.Contig2_All  | 1.19 | 1.91 | Receptor-like protein kinase-like                                |
| Unigene34890_All    | 8.03 | 7.93 | PERK1-like                                                       |
| Unigene56999_All    | 6.87 | 7.29 | Wall-associated receptor kinase-like 1-like                      |
| Unigene10761_All    | 1.88 | 2.54 | Cysteine-rich receptor-like protein kinase 10-like               |
| Unigene11538_All    | 2.01 | 2.37 | lectin S-receptor-like serine/threonine-protein kinase B120-like |
| Unigene5587_All     | 1.26 | 2.63 | Serine/Threonine protein kinase family protein                   |
| Unigene24956_All    | 0.18 | 1.26 | Serine/Threonine-protein kinase                                  |
| Unigene38527_All    | 0.68 | 2.39 | Serine/Threonine-protein kinase bri1                             |
| Unigene2007_All     | 1.58 | 4.57 | lectin S-receptor-like serine/threonine-protein kinase           |
| CL8172.Contig1_All  | 0.55 | 1.30 | LRR receptor-like serine/threonine-protein kinase GSO1-like      |
| Unigene6656_All     | 7.08 | 6.93 | Dual-specificity protein-like phosphatase 3                      |
| Unigene8669_All     | 0.74 | 3.58 | Protein phosphatase 2c                                           |
| Unigene23931_All    | 2.20 | 3.15 | 1-Aminocyclopropane-1-carboxylate oxidase                        |
| CL10105.Contig2_All | 0.39 | 1.44 | 1-Aminocyclopropane-1-carboxylate oxidase homolog                |
| CL8424.Contig2_All  | 2.81 | 4.04 | 1-Aminocyclopropane-1-carboxylate synthase                       |
| Unigene19336_All    | 3.24 | 4.15 | NCED                                                             |
| Unigene13593_All    | 2.95 | 3.43 | CRT/DRE binding factor                                           |
| Unigene11889_All    | 1.56 | 1.62 | Phytosulfokine-alpha peptide precursor                           |
| Unigene3767_All     | 1.70 | 1.95 | Phytosulfokine receptor 2-like                                   |
| CL4819.Contig1_All  | 1.88 | 2.95 | 12-Oxophytodienoate reductase                                    |
| Unigene3744_All     | 2.12 | 3.58 | AOS                                                              |
| Unigene3327_All     | 2.98 | 3.62 | Allene oxide cyclase 4, chloroplastic-like                       |
| CL2211.Contig2_All  | 1.97 | 2.39 | Lipoxygenase                                                     |
| Unigene3018_All     | 5.17 | 6.93 | Zeatin O-glucosyltransferase-like                                |

|                     |       |       |                                                                       |
|---------------------|-------|-------|-----------------------------------------------------------------------|
| Unigene25168_All    | -0.02 | 1.07  | Transcription factor MYC2-like                                        |
| CL2902.Contig1_All  | 0.24  | 1.10  | Topless-related protein 1-like                                        |
| Unigene38_All       | 0.07  | 1.62  | Ribose-phosphate pyrophosphokinase 2                                  |
| CL3142.Contig1_All  | -1.46 | -1.50 | Elongation factor G, chloroplastic-like                               |
| CL10135.Contig3_All | -0.72 | -1.10 | Eukaryotic elongation factor 1A                                       |
| Unigene40486_All    | 0.00  | -2.33 | Elongation factor 1alpha                                              |
| Unigene22044_All    | -1.07 | -2.80 | bHLH51-like                                                           |
| CL3390.Contig1_All  | -0.43 | -1.07 | MYB                                                                   |
| Unigene23203_All    | -0.72 | -1.63 | GATA                                                                  |
| Unigene20317_All    | -1.21 | -1.35 | Liguleless 1 protein                                                  |
| Unigene18371_All    | -1.38 | -9.59 | WRKY                                                                  |
| Unigene51144_All    | -0.55 | -1.79 | GATA                                                                  |
| Unigene11970_All    | -1.01 | -1.14 | Zinc finger protein 3-like                                            |
| Unigene27976_All    | -0.97 | -1.04 | Zinc finger protein 593 homolog                                       |
| Unigene23925_All    | -0.64 | -2.38 | Zinc finger protein constans-like 16                                  |
| Unigene26415_All    | -0.18 | -1.35 | Leucine zipper protein                                                |
| CL6619.Contig1_All  | -0.71 | -2.41 | Homeobox-leucine zipper protein                                       |
| Unigene26415_All    | -0.18 | -1.35 | Leucine zipper protein                                                |
| Unigene10581_All    | -1.02 | -1.36 | Homeobox-leucine zipper protein ATHB-6-like                           |
| Unigene968_All      | -0.91 | -1.62 | Homeobox-leucine zipper protein ATHB-6-like                           |
| Unigene4844_All     | -0.84 | -1.32 | Nucleoside diphosphate kinase 2                                       |
| CL288.Contig1_All   | -0.78 | -1.27 | FGGY family of carbohydrate kinase                                    |
| Unigene596_All      | -0.26 | -1.12 | Calcium-dependent protein kinase 3                                    |
| Unigene927_All      | -0.95 | -2.19 | Serine/Threonine-protein kinase HT1-like                              |
| CL8664.Contig2_All  | -0.90 | -1.18 | Serine/Threonine-protein kinase SAPK10                                |
| Unigene16504_All    | -0.10 | -1.47 | Serine/Threonine-protein kinase HT1                                   |
| Unigene14659_All    | -0.57 | -1.68 | CBL-interacting serine/threonine-protein kinase                       |
| CL9890.Contig1_All  | -0.80 | -1.58 | ABC1 family protein                                                   |
| CL8540.Contig1_All  | -0.60 | -1.55 | Cytokinin dehydrogenase 7-like                                        |
| Roots               |       |       |                                                                       |
| Unigene625_All      | 0.57  | 1.14  | Dof zinc finger protein dof1.7-like                                   |
| CL1607.Contig1_All  | 0.80  | 1.68  | WRKY 1                                                                |
| Unigene12410_All    | 0.86  | 1.67  | NAP-like                                                              |
| Unigene2036_All     | 0.49  | 1.34  | ERF8                                                                  |
| Unigene5805_All     | 0.34  | 1.33  | NAC-like protein 1                                                    |
| Unigene6596_All     | 1.19  | 1.46  | Heat stress transcription factor B-3                                  |
| CL4361.Contig1_All  | 0.34  | 2.79  | MYB39                                                                 |
| CL5171.Contig1_All  | 1.31  | 2.01  | GRAS                                                                  |
| Unigene14974_All    | 1.26  | 1.74  | Transcription factor divaricata-like                                  |
| CL1857.Contig2_All  | 0.63  | 1.48  | Cysteine-rich receptor-like protein kinase                            |
| Unigene16534_All    | 0.16  | 1.29  | CDPK substrate protein 1                                              |
| Unigene917_All      | 1.02  | 1.52  | Calcium-binding protein                                               |
| CL3924.Contig3_All  | 2.34  | 3.40  | Calcium ion binding protein                                           |
| CL1302.Contig2_All  | 0.82  | 1.40  | Calmodulin                                                            |
| Unigene11733_All    | -0.60 | -1.43 | Bzip transcription factor ATB2                                        |
| Unigene23089_All    | -1.57 | -1.92 | Histidine kinase 1                                                    |
| CL1082.Contig2_All  | -0.63 | -1.36 | Protein phosphatase 2C                                                |
| Unigene22250_All    | -0.94 | -1.91 | Auxin response factor                                                 |
| Unigene6666_All     | -0.93 | -1.72 | Auxin-responsive protein IAA27-like isoform 1                         |
| CL10244.Contig1_All | -0.82 | -1.58 | Brassinosteroid insensitive-associated receptor<br>kinase 1 precursor |
| Unigene2780_All     | -2.09 | -2.54 | Gibberellin-regulated protein 4-like                                  |

**Table S6** The continuously up-regulated or down-regulated unigenes related to ROS-scavenging in shoots and roots in *H. ammodendron* under sorbitol treatment

| Gene ID             | Log2 ratio |        | Functional annotation                      |
|---------------------|------------|--------|--------------------------------------------|
|                     | 6h/0h      | 24h/0h |                                            |
| Shoots              |            |        |                                            |
| Unigene8527_All     | 3.33       | 4.29   | Thioredoxin H                              |
| Unigene23370_All    | 2.59       | 3.35   | Thioredoxin H-type 3                       |
| CL10307.Contig1_All | 0.32       | 1.92   | Thioredoxin H9-like                        |
| Unigene11984_All    | 1.67       | 2.20   | Peroxidase                                 |
| Unigene3727_All     | 3.33       | 3.72   | APX                                        |
| CL1674.Contig1_All  | 0.50       | 1.43   | Peroxidase 5                               |
| Unigene20893_All    | 0.55       | 1.40   | Peroxidase 4 Precursor                     |
| Unigene20145_All    | 0.26       | 2.36   | Glutathione S-transferase                  |
| CL2806.Contig1_All  | 0.34       | 1.38   | Monodehydroascorbate reductase             |
| Unigene23361_All    | 0.42       | 2.34   | Mitochondrial AOX1a                        |
| CL7345.Contig1_All  | 1.47       | 2.59   | Chloroplastic polyphenol oxidase precursor |
| CL9446.Contig2_All  | -0.68      | -1.53  | Peroxidase prx12 precursor                 |
| Roots               |            |        |                                            |
| Unigene23361_All    | 0.17       | 1.63   | Mitochondrial AOX1a                        |
| CL483.Contig1_All   | 0.44       | 1.33   | Thioredoxin H-type                         |
| CL2269.Contig1_All  | 6.15       | 7.29   | TRX                                        |
| CL5540.Contig2_All  | 1.00       | 3.81   | Glutathione-s-transferase $\delta$         |
| CL2340.Contig1_All  | 0.66       | 1.64   | GSTU45                                     |
| Unigene3727_All     | -0.41      | -1.10  | APX                                        |

**Table S7** The continuously up-regulated or down-regulated unigenes related to general metabolism in shoots and roots in *H. ammodendron* under sorbitol treatment

| Function       | Gene ID             | Log2 ratio |        | Functional annotation                               |
|----------------|---------------------|------------|--------|-----------------------------------------------------|
|                |                     | 6h/0h      | 24h/0h |                                                     |
| Shoots         |                     |            |        |                                                     |
| Photosynthesis | CL495.Contig2_All   | 6.34       | 7.83   | Plastid-targeted protein 4                          |
|                | CL8116.Contig2_All  | 0.36       | 1.07   | Photosystem II protein CP43                         |
|                | Unigene22249_All    | 1.56       | 1.66   | Photoperiod responsive protein                      |
|                | CL582.Contig2_All   | 0.26       | 1.17   | Ferrochelatase                                      |
|                | Unigene22307_All    | 0.54       | 1.05   | Fructose-bisphosphate aldolase, cytoplasmic isozyme |
|                | CL8287.Contig2_All  | 0.34       | 1.37   | Fructose-bisphosphate aldolase                      |
|                | CL10309.Contig2_All | 2.18       | 2.76   | UDP-glucose 4-epimerase                             |
|                | Unigene15376_All    | 0.28       | 1.07   | Formate dehydrogenase                               |
|                | Unigene7727_All     | 0.35       | 1.03   | 6-Phosphogluconate dehydrogenase decarboxylating    |
|                | CL3800.Contig1_All  | 0.26       | 1.61   | Neutral invertase-like protein                      |
|                | Unigene29308_All    | -0.53      | -1.94  | Ribulose-1,5-bisphosphate carboxylase oxygenase     |
|                | CL1478.Contig2_All  | -0.73      | -1.20  | Ribulose-bisphosphate carboxylase                   |
|                | Unigene19857_All    | -0.48      | -1.39  | Phosphoenolpyruvate carboxylase kinase              |
|                | Unigene20826_All    | -0.22      | -6.98  | Chloroplast oxygen-evolving enhancer protein 1      |

|           |                    |       |       |                                                 |
|-----------|--------------------|-------|-------|-------------------------------------------------|
|           | Unigene25759_All   | -1.06 | -1.38 | Chloroplast outer envelope membrane protein     |
|           | Unigene2293_All    | -0.21 | -1.66 | Chlorophyll a/b-binding protein                 |
|           | Unigene23997_All   | 0.13  | -1.51 | Chloroplast RNA binding protein                 |
|           | Unigene22119_All   | -0.62 | -1.23 | PsaH (chloroplast)                              |
|           | Unigene23921_All   | -0.64 | -1.39 | NADP-dependent malic enzyme                     |
|           | CL7791.Contig2_All | -0.47 | -1.49 | NADP-dependent malic enzyme                     |
|           | CL9028.Contig1_All | -0.11 | -1.21 | Plastid ribosomal protein PRPL5                 |
|           | Unigene34045_All   | -1.31 | -2.29 | Ferredoxin-1, chloroplastic                     |
|           | CL2761.Contig2_All | -0.67 | -1.58 | Transketolase, chloroplastic                    |
|           | Unigene51492_All   | 2.05  | -6.17 | Transaldolase                                   |
|           | CL1236.Contig1_All | -0.59 | -1.30 | Sedoheptulose-1,7-bisphosphatase, chloroplastic |
|           | CL8781.Contig2_All | -0.23 | -1.39 | Pyruvate orthophosphate dikinase                |
|           | Shoots             |       |       |                                                 |
|           | CL4502.Contig1_All | 5.17  | 8.17  | Glucan endo-1,3-beta-glucosidase                |
|           | Unigene5573_All    | 1.94  | 1.94  | Glucan endo-1,3-beta-D-glucosidase              |
|           | Unigene13421_All   | 0.96  | 2.96  | Xyloglucan endotransglycosylase/hydrolase 1     |
|           | CL602.Contig1_All  | 0.15  | 1.93  | Xyloglucan endotransglucosylase                 |
|           | CL602.Contig2_All  | 0.12  | 1.52  | Xyloglucan endotransglucosylase                 |
|           | Unigene14716_All   | 4.75  | 7.29  | Laccase-12-like                                 |
|           | Unigene25164_All   | 2.22  | 2.22  | Inositol oxygenase 2-like                       |
|           | CL5568.Contig5_All | 1.08  | 1.96  | Expansin-like A1-like                           |
|           | Unigene17630_All   | 0.63  | 1.09  | Expansin-like B1                                |
|           | Unigene20699_All   | 2.00  | 2.02  | Polygalacturonase inhibitor protein             |
| Cell wall | Unigene13337_All   | 5.75  | 7.58  | Polygalacturonase inhibitor protein             |
|           | Unigene9154_All    | 0.95  | 1.46  | Cinnamate 4-hydroxylase                         |
|           | Unigene15310_All   | 0.42  | 3.50  | Cinnamate 4-hydroxylase                         |
|           | CL5562.Contig1_All | 1.19  | 1.31  | Caffeic acid 3-O-methyltransferase              |
|           | CL9978.Contig1_All | 1.00  | 2.66  | Callose synthase 3                              |
|           | Unigene4771_All    | 1.04  | 3.06  | Lipid binding protein                           |
|           | CL2344.Contig1_All | 0.36  | 1.64  | Lipid transfer protein                          |
|           | CL2344.Contig2_All | 0.90  | 1.65  | Lipid transfer protein                          |
|           | Unigene15391_All   | 2.52  | 3.70  | Lipid/Phospholipid transfer protein(PLTP)       |
|           | Unigene6345_All    | 0.96  | 1.83  | Lipid-transfer protein type 2                   |
|           | Unigene1022_All    | 0.81  | 2.00  | Lipase class 3-like protein                     |
|           | Unigene5087_All    | -1.01 | -1.48 | Pectinesterase inhibitor                        |
|           | Roots              |       |       |                                                 |
|           | Unigene4771_All    | 0.24  | 1.00  | Lipid binding protein                           |
|           | Unigene15310_All   | 1.06  | 2.44  | Cinnamate 4-hydroxylase                         |



|                      |                    |       |       |                                      |
|----------------------|--------------------|-------|-------|--------------------------------------|
|                      | Unigene14669_All   | -0.41 | -1.10 | Cinnamyl alcohol dehydrogenase       |
|                      | CL7785.Contig2_All | -1.24 | -2.90 | Polyphenoloxidase                    |
|                      | Shoots             |       |       |                                      |
|                      | Unigene9650_All    | 1.39  | 2.65  | Leucoanthocyanidin dioxygenase-like  |
|                      | Unigene23979_All   | 4.17  | 7.03  | Chalcone synthase                    |
|                      | CL8370.Contig2_All | 2.84  | 3.39  | Polyneuridine-aldehyde esterase      |
|                      | Unigene18566_All   | 0.13  | 1.60  | Nicotinamidase                       |
|                      | Unigene3151_All    | 1.02  | 1.03  | Homogentisate phytyltransferase      |
|                      | CL6009.Contig1_All | 1.95  | 2.36  | Cytochrome P450                      |
|                      | Unigene5962_All    | 2.38  | 2.99  | Cytochrome P450 94A1-like            |
|                      | Unigene25199_All   | 5.75  | 7.12  | Cytochrome P450                      |
|                      | Unigene17304_All   | 2.07  | 2.18  | Cytochrome P450 83B1-like            |
| Secondary metabolism | Unigene34432_All   | 0.71  | 2.27  | Cytochrome P450                      |
|                      | Unigene34834_All   | 1.24  | 1.72  | Cytochrome c oxidase subunit 2       |
|                      | Unigene5961_All    | 1.53  | 1.98  | Cytochrome P450                      |
|                      | Unigene18122_All   | -0.24 | -1.21 | Farnesyl diphosphate synthase        |
|                      | CL970.Contig1_All  | -0.24 | -1.43 | Geranyl pyrophosphate synthase       |
|                      | CL7562.Contig2_All | -1.06 | -1.05 | Solanesyl diphosphate synthase       |
|                      | Unigene20429_All   | -0.59 | -1.01 | Isoflavone reductase homolog         |
|                      | Roots              |       |       |                                      |
|                      | Unigene5962_All    | 0.25  | 3.20  | Cytochrome P450 94A1-like            |
|                      | Unigene40893_All   | 0.45  | 1.23  | 2-Nitropropane dioxygenase family    |
|                      | Unigene6592_All    | -1.14 | -4.07 | Geranylgeranyl diphosphate reductase |

**Table S8** The continuously up-regulated or down-regulated unigenes related to stress response genes in shoots and roots in *H. ammodendron* under sorbitol treatment

| Gene ID             | Log <sub>2</sub> ratio |       | Functional annotation                        |
|---------------------|------------------------|-------|----------------------------------------------|
|                     | 6h/0h                  | 24/0h |                                              |
| Shoots              |                        |       |                                              |
| Unigene7846_All     | 0.00                   | 2.02  | Universal stress protein YxiE-like           |
| Unigene10745_All    | 2.12                   | 2.59  | Defensin-like protein                        |
| Unigene18131_All    | 0.54                   | 1.92  | Multidrug and toxin extrusion protein 2-like |
| CL10126.Contig3_All | 2.69                   | 4.03  | Germin-like protein                          |
| CL9957.Contig2_All  | 0.29                   | 2.13  | Resistance protein                           |
| CL301.Contig1_All   | 0.69                   | 1.25  | L-allo-threonine aldolase-like               |
| Unigene3656_All     | 1.23                   | 2.40  | Phosphoethanolamine N-methyltransferase      |
| Unigene23534_All    | 0.64                   | 2.85  | Phosphoethanolamine N-methyltransferase      |
| Unigene5998_All     | 0.34                   | 1.87  | ACD-sHSPs-like protein                       |
| CL2793.Contig4_All  | 2.12                   | 3.74  | thaumatin-like protein                       |
| CL2793.Contig2_All  | 1.74                   | 3.41  | thaumatin-like protein                       |
| Unigene4757_All     | 2.47                   | 3.24  | Putative dehydrin                            |
| Unigene25984_All    | 0.37                   | 1.15  | Delta-1-pyrroline-5-carboxylate synthase     |
| Unigene25313_All    | 1.56                   | 3.50  | LEA protein D-29                             |
| Unigene3754_All     | 2.46                   | 5.01  | LEA protein group 8 protein                  |
| CL8223.Contig2_All  | 5.17                   | 7.44  | LEA                                          |
| CL1418.Contig1_All  | 0.61                   | 2.35  | alpha-1,4-glucan-protein synthase            |

|                     |       |       |                                                                |
|---------------------|-------|-------|----------------------------------------------------------------|
| CL7583.Contig2_All  | 1.38  | 2.80  | Nbs-lrr resistance protein                                     |
| Unigene16430_All    | 1.20  | 3.34  | Pathogenesis-related protein                                   |
| Unigene28987_All    | 0.00  | 7.44  | Nbs-lrr resistance protein                                     |
| Unigene23106_All    | -0.11 | 2.53  | Nbs-lrr resistance protein                                     |
| Unigene10905_All    | 0.32  | 1.45  | Reticulon-like protein B8 isoform 3                            |
| Unigene5096_All     | 0.25  | 1.13  | BED finger-nbs-lrr resistance protein                          |
| CL9422.Contig1_All  | 1.25  | 1.67  | Pathogenesis-related protein R major form -like protein E22    |
| CL841.Contig1_All   | 1.52  | 2.19  | Pathogenesis-related protein                                   |
| CL5692.Contig1_All  | 7.17  | 7.64  | Pathogenesis-related protein 10a                               |
| Unigene3614_All     | 7.08  | 6.13  | Nbs-lrr resistance protein                                     |
| Unigene25274_All    | 1.61  | 1.59  | Disease resistance response protein 206-like                   |
| Unigene6693_All     | 1.00  | 2.07  | Chitinase, class V                                             |
| CL6655.Contig1_All  | 1.07  | 1.37  | Chitinase                                                      |
| Unigene7676_All     | -0.56 | -1.02 | Proline-rich protein                                           |
| Unigene25254_All    | -0.79 | -1.24 | 20 kDa chaperonin, chloroplastic                               |
| Unigene20539_All    | -0.59 | -1.21 | Chaperone protein DNAJ 16-like                                 |
| Unigene12360_All    | -0.87 | -1.76 | Thaumatococcus-like protein-like                               |
| CL7515.Contig1_All  | -0.39 | -1.57 | Major latex like protein homolog                               |
| Unigene6717_All     | -0.15 | -1.28 | Bifunctional polymyxin resistance protein ArnA-like            |
| CL2635.Contig3_All  | -2.10 | -2.79 | Momilactone A synthase-like                                    |
| CL5231.Contig2_All  | -0.81 | -6.98 | Bifunctional dihydroflavonol 4-reductase/flavanone 4-reductase |
| CL9106.Contig2_All  | -0.81 | -1.22 | Bifunctional dihydroflavonol 4-reductase/flavanone 4-reductase |
| <b>Roots</b>        |       |       |                                                                |
| Unigene18131_All    | 0.69  | 1.45  | Multidrug and toxin extrusion protein 2-like                   |
| CL1403.Contig7_All  | 0.71  | 1.34  | Cold acclimation protein                                       |
| CL10305.Contig1_All | 0.74  | 2.94  | Dehydration responsive protein                                 |
| Unigene402_All      | 0.28  | 1.57  | Chaperone protein ClpB3                                        |
| CL214.Contig1_All   | -0.91 | -1.15 | Anti-microbial protein 2                                       |
| Unigene17571_All    | 0.50  | 1.41  | Harpin-induced protein                                         |
| CL10252.Contig1_All | 1.12  | 1.39  | HSPRO                                                          |
| Unigene14394_All    | -0.84 | -1.62 | Choline monooxygenase, chloroplastic-like                      |
| CL9677.Contig2_All  | -0.50 | -2.67 | Glutaredoxin-C11                                               |
| Unigene6283_All     | -0.65 | -1.27 | Actin depolymerizing factor                                    |
| Unigene25767_All    | -2.61 | -3.28 | Metallothionein type 3                                         |
| CL9397.Contig1_All  | -1.02 | -2.75 | Salt-induced protein                                           |
| Unigene26784_All    | -0.41 | -2.08 | Oxalate oxidase-like germin 171                                |
| Unigene7697_All     | -0.70 | -3.20 | Salt-induced protein                                           |
| Unigene6025_All     | -0.86 | -1.27 | NBS-LRR disease resistance protein homologue                   |
| CL214.Contig1_All   | -0.91 | -1.15 | Anti-microbial protein 2                                       |
